# Supplementary material for: Rapid microwave-assisted hydrothermal synthesis of CeO2 octahedra with mixed valence states and their catalytic activity for thermal decomposition of ammonium perchlorate
Source: Royal Society of Chemistry journal article supplement (doi:10.1039/c9qi00362b), 2019-01-01
Supplement: c9qi00362b1.pdf [file c9qi00362b1.pdf]

## Supporting Information

### **Rapid microwave-assisted hydrothermal synthesis of CeO<sub>2</sub> octahedrons with mixed valence state and their catalytic activity for thermal decomposition of ammonium perchlorate**

*Jing Shi,<sup>a</sup> Huixiang Wang,<sup>b</sup> Yequn Liu,<sup>a</sup> Xiaobo Ren,<sup>b,c</sup> Haizhen Sun,<sup>a</sup> and Baoliang  
Lv<sup>\*,b</sup>*

<sup>a</sup> Analytical Instrumentation Center, State Key Laboratory of Coal Conversion,  
Institute of Coal Chemistry, Chinese Academy of Sciences, Taiyuan, 030001, China

<sup>b</sup> State Key Laboratory of Coal Conversion, Institute of Coal Chemistry, Chinese  
Academy of Sciences, Taiyuan, 030001, China

<sup>c</sup> University of Chinese Academy of Sciences, Beijing 100049, China.

\* Corresponding author. Tel: +86-0351-4063121; Fax: +86-0351-4041153;

E-mail: [lbl604@sxicc.ac.cn](mailto:lbl604@sxicc.ac.cn)

## Synthesis of CeO<sub>2</sub> cubes

0.868 g of Ce(NO<sub>3</sub>)<sub>3</sub>·6H<sub>2</sub>O and 9.6 g of NaOH were dissolved in 5 and 35 mL of deionized water, respectively. Then, these two solutions were mixed in a Teflon bottle, and this mixture was kept stirring for 30 min with the formation of a milky slurry. Subsequently, the Teflon bottle was held in a stainless steel vessel autoclave. Finally, the autoclave was sealed and transferred into a electric oven, and was subjected to hydrothermal treatment at 180 °C for 24 h. After the hydrothermal treatment, fresh white precipitates were separated by centrifugation, washed with deionized water and ethanol several times, followed by drying at 60 °C in air overnight.

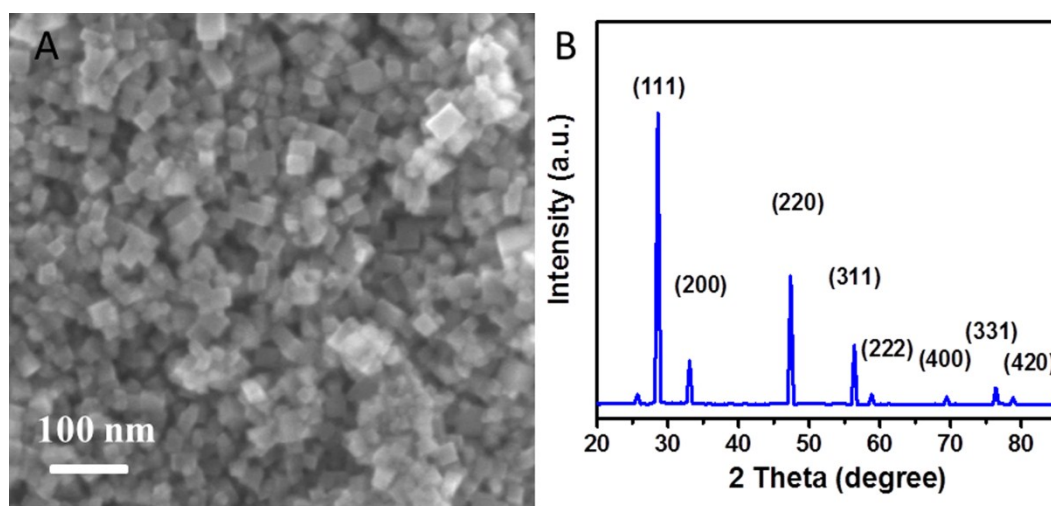

Fig. S1 SEM image (A) and XRD pattern (B) for CeO<sub>2</sub> cubes.

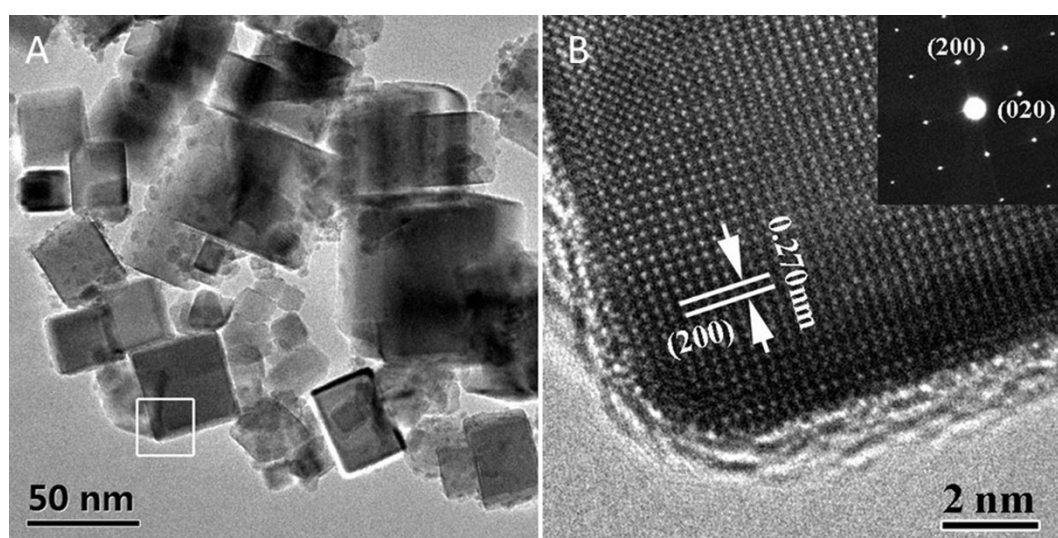

Fig. S2 TEM and HRTEM images of CeO<sub>2</sub> cubes: (A) the overview of typical cubes, (B) the HRTEM image of white regions in (A), inset is a fast Fourier transform (FFT) analysis.

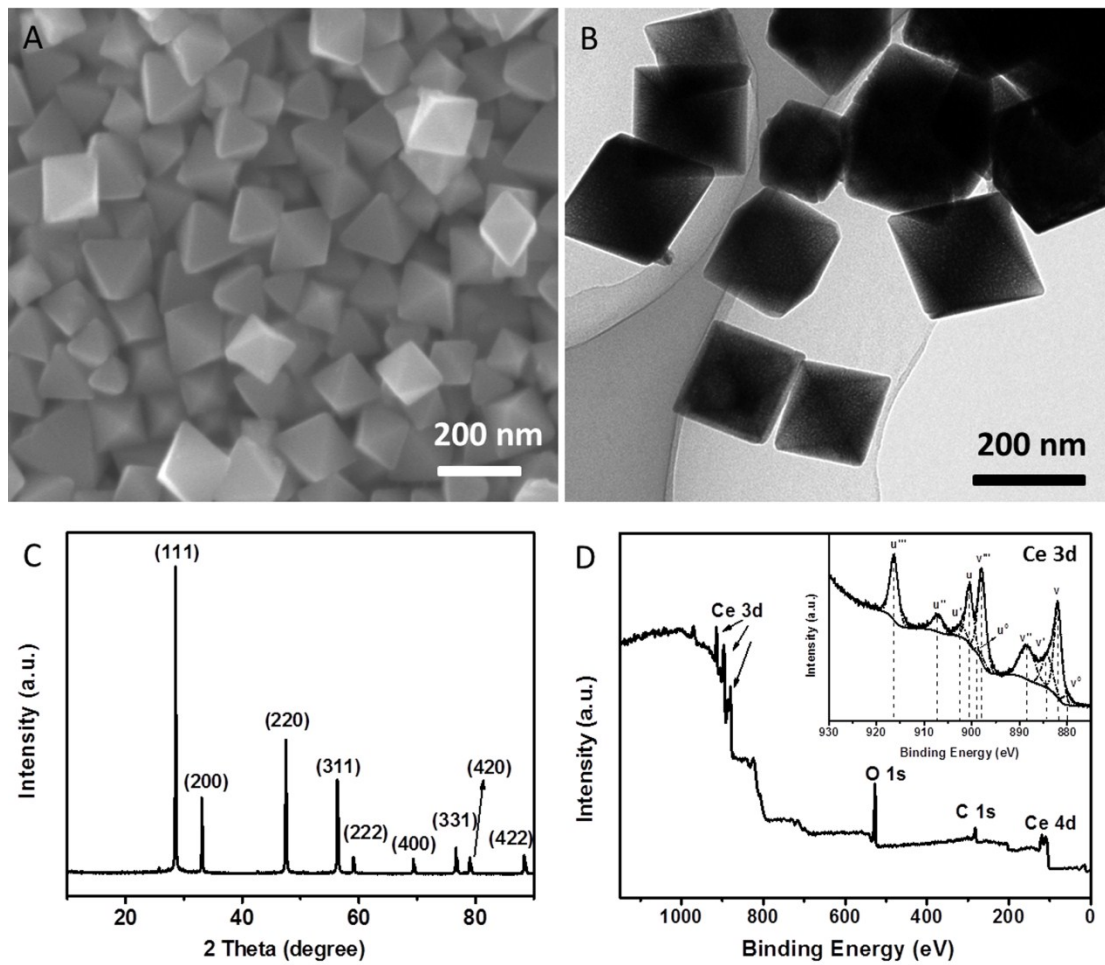

Fig. S3 (A) SEM and (B) TEM images, (C) XRD and (D) the survey XPS patterns of recovered  $\text{CeO}_2$  catalyst, the inset in (D) is the multi peak separation patterns of Ce 3d.
